# Supplementary material for: Umbilical cord extracts improve osteoporotic abnormalities of bone marrow-derived mesenchymal stem cells and promote their therapeutic effects on ovariectomised rats
Source: PubMed Central journal article supplement (PMC5773568; doi:10.1038/s41598-018-19516-6), 2018-01-18

1

2 **SUPPLEMENTARY INFORMATION**

3

4 **1. Supplementary Results**

5 **2. Supplementary Methods**

6 **3. Supplementary Figure and Table Legends**

7 **4. Supplementary Tables**

8 **5. Supplementary Figures**

9

10 **Title**

11 **Umbilical cord extracts improve osteoporosis-induced abnormalities of bone**

12 **marrow-derived mesenchymal stem cells and promote their therapeutic effects on**

13 **ovariectomised rats**

14 Akira Saito, Kanna Nagaishi\*, Kousuke Iba, Yuka Mizue, Takako Chikenji, Miho Otani,

15 Masako Nakano, Kazusa Oyama, Toshihiko Yamashita, and Mineko Fujimiya

16 \*Corresponding author

## 1 **Supplementary Results**

### 2 **Bone volume and histological findings were abnormal in OVX rats**

3 An osteoporosis model was constructed using OVX rats and analysed at 4 and  
4 8 weeks after surgery. Micro-computed tomography (micro-CT) showed that the  
5 number and volume of trabeculae were obviously reduced in the proximal tibia of OVX  
6 rats compared with Sham rats (Supplementary Fig. S1a). Trabecular bone mass was  
7 markedly reduced with time after OVX. In quantitative analysis of micro-CT images,  
8 bone volume fraction and trabecular number were significantly decreased, while  
9 trabecular separation was significantly increased in OVX rats 4 and 8 weeks after OVX  
10 ( $P = 0.008$  at 4 weeks,  $P = 0.002$  at 8 weeks, Supplementary Fig. S1b;  $P = 0.016$  at 4  
11 weeks,  $P = 0.011$  at 8 weeks, Supplementary Fig. S1d;  $P = 0.014$  at 4 weeks,  $P < 0.001$   
12 at 8 weeks, Supplementary Fig. S1e). Trabecular thickness was not significantly  
13 decreased in OVX rats compared with Sham rats 4 and 8 weeks after OVX ( $P = 0.6$  at 4  
14 weeks,  $P = 0.274$  at 8 weeks, Supplementary Fig. S1c).

15

### 16 **Immunophenotype of BM-MSC surface antigens**

17 The immunophenotype of cell surface antigens was similar between  
18 OVX-MSCs and Sham-MSCs (Supplementary Fig. S2a). It was unchanged in  
19 OVX-MSCs-WJ(+) compared with OVX-MSCs-WJ(-) (Supplementary Fig. S2a).

1  
2  
3  
4  
5  
6  
7  
8  
9  
10  
11  
12  
13  
14  
15  
16  
17  
18

**Abnormal morphology of BM-MSCs derived from OVX rats**

Morphological findings of BM-MSCs isolated from OVX rats (OVX-MSCs) were abnormal in phase contrast observations, with short and dull cell protrusions, enlarged cell area, flattened shape, and disordered orientation of cells compared with BM-MSCs isolated from Sham rats (Sham-MSCs). These findings were similarly observed from passage 0 (P0) to P2 (Supplementary Fig. S2b).

**Differentiation potential into multiple mesenchymal lineages was altered in OVX-MSCs and OVX-MSCs-WJ(+)**

Osteogenic differentiation ability was decreased in OVX-MSCs-WJ(-) compared with Sham-MSCs, as indicated by a decreased number of alkaline phosphatase-positive cells (Supplementary Fig. S2c, upper panels) and alizarin red-positive cells (Supplementary Fig. S2c, middle panels). Conversely, adipogenic differentiation ability was enhanced in OVX-MSCs-WJ(-) compared with Sham-MSCs, as indicated by an increased number of Oil red O-positive lipid droplets in the cytoplasm of BM-MSCs (Supplementary Fig. S2c, lower panels). Osteogenic differentiation was slightly suppressed in OVX-MSCs-WJ(+) compared with

1 OVX-MSCs-WJ(-), as indicated by a decreased number of alkaline  
2 phosphatase-positive cells (Supplementary Fig. S2c, upper panels) and alizarin  
3 red-positive cells (Supplementary Fig. S2c, middle panels). Conversely, adipogenic  
4 differentiation ability was unchanged in OVX-MSCs-WJ(+) compared with  
5 OVX-MSCs, as indicated by the number of Oil red O-positive lipid droplets in the  
6 cytoplasm of BM-MSCs (Supplementary Fig. S2c, lower panels).

7

#### 8 **Distribution of Sham-MSCs, OVX-MSCs-WJ(-), and OVX-MSCs-WJ(+) in OVX**

#### 9 **rats**

10 PKH26-labelled BM-MSCs were distributed in the bone marrow of the  
11 epiphysis in OVX rats (Supplementary Fig. S4a). The number of distributed cells in  
12 bone was larger in OVX-Sham-MSCs and OVX-OVX-MSCs-WJ(+) rats compared  
13 with OVX-OVX-MSCs-WJ(-) rats on days 1, 3, and 7 after each cell administration  
14 (Supplementary Fig. S4b). PKH26 fluorescence-labelled BM-MSCs were also  
15 distributed in the lung on days 1, 3, and 7 after each cell administration, but there was  
16 no difference between the cell types examined (Supplementary Fig. S4c,d).

17

#### 18 **Differentiation and maturation of RAW264.7 cell-derived osteoclasts *in vitro***

1           The macrophage cell line RAW264.7 was differentiated into  
2 macrophage-derived osteoclasts by adding receptor activator of nuclear factor  $\kappa$ -B  
3 ligand (RANKL) alone or in combination with the MEK inhibitor PD98059 *in vitro*  
4 (Supplementary Fig. S5a). Macrophages were fused into multinucleated osteoclasts.  
5 Morphologically, osteoclasts became larger and more mature by the addition of  
6 RANKL and PD98059 in combination, but not with RANKL alone (Supplementary Fig.  
7 S5b). TRACP activity in the culture supernatant of macrophage-derived osteoclasts was  
8 increased 72 h after induction with RANKL ( $P < 0.05$ , Supplementary Fig. S5c).

9

#### 10 **Differentiation and maturation of mouse BMC-derived osteoclasts *in vitro***

11           Mouse BMCs were differentiated into macrophage-derived osteoclasts by the  
12 addition of RANKL alone or in combination with PD98059 *in vitro* (Supplementary Fig.  
13 S6a). Macrophages in the BMC cultures were fused into multinucleated osteoclasts.  
14 Morphologically, osteoclasts became larger and more mature with the addition of  
15 RANKL and PD98059 in combination, but not with RANKL alone (Supplementary Fig.  
16 S6b). TRACP activity in the culture supernatant of macrophage-derived osteoclasts was  
17 increased 10 days after induction with RANKL ( $P < 0.05$ , Supplementary Fig. S6c).

18

## 1 **Supplementary Methods**

### 2 **Isolation, culture, and characterisation of BM-MSCs**

3 Bone marrow was collected from Sham and OVX rats. BM-MSCs were  
4 harvested by adherent cultures of BMCs as previously described<sup>1</sup>. Briefly, BMCs were  
5 harvested from femurs and tibias by flushing whole bone marrow with complete  
6  $\alpha$ -modified Eagle's medium ( $\alpha$ -MEM; GIBCO BRL, Palo Alto, CA, USA) containing  
7 15% foetal bovine serum (FBS) and 1% penicillin/streptomycin (P/S). Bone marrow  
8 cells were suspended as single cells and plated. Cells were grown in complete  $\alpha$ -MEM  
9 at 37°C and 5% CO<sub>2</sub>. Adherent cells grown to confluency were defined as P0. Cells at  
10 P2–4 were used for experiments. Surface antigens of BM-MSCs were detected by  
11 fluorescence-activated cell sorting (Calibur; BD Bioscience, Franklin Lakes, NJ, USA)  
12 using rat surface antigen-specific antibodies to CD90, CD44, CD31, HLA-DR, CD45,  
13 CD11b, and CD34. Primary and secondary antibodies used for fluorescence-activated  
14 cell sorting are listed in Supplementary Tables S1 and S2.

15

### 16 **Quantitative real-time reverse transcription polymerase chain reaction (RT-PCR)** 17 **of BM-MSCs**

18 Total RNA was extracted using TRI Reagent (Molecular Research Center, Inc.,

1 Cincinnati, OH, USA), and 1 µg total RNA was reverse-transcribed into cDNA with  
2 oligo-dT primers (Promega, Madison, WI, USA) using an Omniscript RT Kit (QIAGEN,  
3 Hilden, Germany). Quantitative PCR was performed using an ABI PRISM 7500  
4 Real-Time PCR System (Applied Biosystems, Foster City, CA, USA) with Universal  
5 SYBR PCR Master Mix (PerkinElmer, Covina, CA, USA). Thermal cycling conditions  
6 were as follows: 40 cycles of a two-step amplification (95°C for 15 s and 60°C for 1  
7 min). Data were analysed using the comparative Ct method ( $\Delta\Delta\text{CT}$  method). Specific  
8 primers used for rat *Opg* are shown in Supplementary Table S5. Rat Gapdh primers  
9 acted as an internal standard for RNA integrity and quantity. All PCRs were performed  
10 at least in duplicate.

11

## 12 **Osteogenic differentiation of BM-MSCs**

13 The *in vitro* differentiation potential of BM-MSCs was confirmed by  
14 previously described methods<sup>2</sup>. The multilineage differentiation potential of BM-MSCs  
15 was identified by culturing cells. MSCs were plated at a concentration of  $4.2 \times 10^3$   
16 cells/cm<sup>2</sup> on 4-well slides with MSC culture medium and incubated at 37°C and 5%  
17 CO<sub>2</sub>. When cells were at 70% confluency 24–48 h later, the medium was replaced with  
18 500 µL of osteogenic differentiation medium. The osteogenic differentiation medium

1 was replaced every 3 days. After BM-MSCs were cultured in osteogenic differentiation  
2 medium for 21 days, they were stained with alkaline phosphatase and alizarin red.

3

#### 4 **Adipogenic differentiation of BM-MSCs**

5 The multilineage differentiation potential of BM-MSCs was identified by  
6 culturing cells. BM-MSCs were plated at a concentration of  $2.1 \times 10^4$  cells/cm<sup>2</sup> on a  
7 4-well slide with MSC culture medium and incubated at 37°C and 5% CO<sub>2</sub>. When the  
8 cells were 100% confluent 24–48 h later, the medium was replaced with 500 µL of  
9 adipogenic differentiation medium. The adipogenic differentiation medium was  
10 replaced every 3 days. After BM-MSCs were cultured in adipogenic differentiation  
11 medium for 14 days, they were stained with Oil Red O.

12

#### 13 **Immunofluorescence staining of BM-MSCs**

14 Immunofluorescence staining of TGF-β1 in BM-MSCs was performed. Each  
15 BM-MSC type [Sham-MSCs, OVX-MSCs-WJ(-), and OVX-MSCs-WJ(+); n = 4 per  
16 group] was plated in an 8-well chamber slide and cultured for 72 h. WJS (of 0.25  
17 mg/ml) was added to culture medium for 48 h prior to the fixation of cells. Following  
18 incubation, BM-MSCs were fixed in 4% paraformaldehyde for 20 min.



1 Immunofluorescence staining of TGF- $\beta$ 1 was performed by incubating BM-MSCs with  
2 primary and secondary antibodies (Supplementary Tables S3 and S4). Nuclei were  
3 stained with DAPI (Dojindo Laboratories). Stained sections were observed under a  
4 confocal laser-scanning microscope.

5

## 6 **Scratch assay**

7 The mobilisation ability of BM-MSCs was evaluated by measuring the area of  
8 an open wound at 6 h and 12 h after scratching the cell monolayer. After plating  $5 \times 10^4$   
9 BM-MSCs [Sham-MSCs, OVX-MSCs-WJ(-), and OVX-MSCs-WJ(+); n = 4 per group]  
10 in 35-mm dishes and culturing for 72 h, WJS was added (concentration of 0.25 mg/ml)  
11 to culture medium of OVX-MSCs-WJ(+) for 48 h prior to commencing the scratch  
12 assay. Crossed straight lines were added to the cell monolayer to create a “scratch” with  
13 a P25 pipette tip, and debris was removed by extensive washing. Medium was replaced  
14 with 1.5 mL of complete medium. Phase contrast images were taken immediately after  
15 making scratches and wound closure was monitored for 12 h. Each experiment was  
16 repeated at six times. Open area of the cell monolayer was measured using ImageJ  
17 software<sup>3</sup>.

18

## 1 **Chemotaxis assay**

2           The migration assay was carried out using 12-well culture plates with cell  
3 culture inserts containing membranes with 8- $\mu$ m pores. Upper chambers were loaded  
4 with  $5 \times 10^4$  of PKH-26-labelled BM-MSCs with 200  $\mu$ l of  $\alpha$ -MEM containing 15%  
5 FBS and 1% P/S, while lower chambers were loaded with 1000  $\mu$ l of  $\alpha$ -MEM  
6 containing 15% FBS and 1% P/S. After 24 hours, the upper chamber medium was  
7 changed to 200  $\mu$ l of  $\alpha$ -MEM containing 0.5% FBS, and the lower chamber was  
8 changed to 1000  $\mu$ l of  $\alpha$ -MEM containing 0.5% FBS with or without 100 ng/ml of  
9 SDF-1 (Peprotech, Inc., Rocky Hill, NJ, USA), 100 ng/ml of IL-1 $\beta$  (BioLegend, Inc.  
10 San Diego, USA), or 100 ng/ml of IL-6 (BioLegend). Following incubation for 24 h,  
11 cells remaining in the upper chamber were removed with cotton swabs, and membranes  
12 and lower chamber cells were fixed in 4% paraformaldehyde for 20 min. Cells that  
13 migrated to the opposite side of the membrane were stained with DAPI. The number of  
14 migrated cells per unit area was determined by counting three randomly selected fields  
15 of the membrane with a confocal microscope, and the bottom of the cell culture plate  
16 with light a microscope. Recombinant chemokines used for chemotaxis assay were  
17 listed in Supplementary Table S6.

18

1 **Distribution of donor BM-MSCs**

2 Sham-MSCs, OVX-MSCs, and OVX-MSCs-WJ(+) were labelled with a  
3 PKH26 Red Fluorescent Cell Linker Kit (Sigma-Aldrich) and administered to OVX rats  
4 by tail vein injection 4 weeks after OVX. Rats were euthanised 1, 3, or 7 days after  
5 BM-MSC injection, and tibias, lung, liver, and spleen were collected. Bone tissues were  
6 immersed in 4% paraformaldehyde for 2 days, and decalcified with 0.5 M  
7 ethylenediaminetetraacetic acid (Wako, Osaka, Japan) for 30 days. Lung, liver, and  
8 spleen were fixed in 4% paraformaldehyde for 2 days. Frozen sections were stained  
9 with DAPI (Dojindo Laboratories, Kumamoto, Japan) at 0.1 mg/mL. The distribution of  
10 BM-MSCs expressing red fluorescence in each tissue was observed by confocal  
11 laser-scanning microscopy (LSM 510; Carl Zeiss, Oberkochen, Germany). The number  
12 of distributed to bone per unit area was determined by counting three randomly selected  
13 fields of the view with a confocal microscope in 200 times magnification. The number  
14 of distributed to lung per unit area was determined by counting five randomly selected  
15 fields of the view with a confocal microscope in 100 times magnification.

16

17 **Differentiation and maturation of RAW264.7 cell-derived osteoclasts *in vitro***

18 Osteoclastogenesis of monocytes/macrophages was conducted by modifying

1 the method of Yonezawa et al.<sup>1</sup>. The murine RAW264.7 monocyte/macrophage cell line  
2 (ATCC, Manassas, VA, USA) was used as osteoclast precursors. Cells were grown to  
3 subconfluence in a T75 standard flask with Dulbecco's Modified Eagle's Medium  
4 (DMEM; Wako Pure Chemical, Osaka, Japan) supplemented with 10% heat-inactivated  
5 FBS (Invitrogen, Frederick, MD, USA) and 1% penicillin-streptomycin-glutamine 100×  
6 (1% P/S) at 37°C in a humidified atmosphere of 5% CO<sub>2</sub>. Subsequently, RAW264.7  
7 cells were transferred to 12-well culture plates and cultured in DMEM supplemented  
8 with 15% heat-inactivated FBS and 1% PS at 37°C in a humidified atmosphere of 95%  
9 air and 5% CO<sub>2</sub>. After 24 h, the culture medium was changed to α-MEM (Wako Pure  
10 Chemical) supplemented with 15% heat-inactivated FBS and 1% P/S. For  
11 differentiation into mature osteoclasts, RAW264.7 cells (5.0 × 10<sup>4</sup> cells/well in 12-well  
12 culture plates) were cultured for 72 h in the presence of RANKL (100 ng/mL) and/or  
13 PD98059 (20 mM), a MAPK inhibitor that accelerates osteoclastogenesis. Cell  
14 morphology and supernatant TRACP levels were evaluated.

15

#### 16 **Differentiation and maturation of mouse BMC-derived osteoclasts *in vitro***

17 Osteoclastogenesis of mouse BMCs was conducted by modifying the method  
18 of Yonezawa et al.<sup>4</sup>. Briefly, mouse BMCs from 7-week-old C57BL/6 mice were used

1 as osteoclast precursors. Cells were grown to subconfluence in a T25 standard flask  
2 with  $\alpha$ -MEM supplemented with 10% FBS, 1% P/S, and 100 ng/mL recombinant mouse  
3 M-CSF at 37°C in a humidified atmosphere of 5% CO<sub>2</sub>. Subsequently, mouse BMCs  
4 were transferred to 12-well culture plates and cultured with  $\alpha$ -MEM supplemented with  
5 10% FBS, 1% P/S, and 100 ng/mL M-CSF at 37°C in a humidified atmosphere of 95%  
6 air and 5% CO<sub>2</sub>. After 48 h, the culture medium was changed to  $\alpha$ -MEM supplemented  
7 with 15% FBS, 1% P/S, and 100 mg/mL M-CSF. For differentiation into mature  
8 osteoclasts, mouse BMCs ( $6.0 \times 10^5$  cells/well in 12-well culture plates) were cultured  
9 for 10 days in the presence of RANKL (100 ng/mL) with or without PD98059 (20 mM).  
10 Cell morphology and supernatant TRACP levels were evaluated.

11

## 12 **Measurement of TRACP levels in culture supernatant of osteoclasts**

13 Culture supernatants of osteoclasts were collected and stored at -80°C until use.  
14 TRACP levels in culture supernatants were measured with a TRACP & ALP Assay Kit  
15 (Takara Bio, Inc., Shiga, Japan) according to the manufacturer's instructions.

16

## 17 **Supplementary References**

- 1 1 Javazon, E. H., Colter, D. C., Schwarz, E. J. & Prockop, D. J. Rat marrow  
2 stromal cells are more sensitive to plating density and expand more rapidly from  
3 single-cell-derived colonies than human marrow stromal cells. *Stem Cells* **19**,  
4 219-225, doi:10.1634/stemcells.19-3-219 (2001).
- 5 2 Romanov, Y. A., Svintsitskaya, V. A. & Smirnov, V. N. Searching for  
6 alternative sources of postnatal human mesenchymal stem cells: candidate  
7 MSC-like cells from umbilical cord. *Stem Cells* **21**, 105-110,  
8 doi:10.1634/stemcells.21-1-105 (2003).
- 9 3 Schneider, C. A., Rasband, W. S. & Eliceiri, K. W. NIH Image to ImageJ: 25  
10 years of image analysis. *Nat Methods* **9**, 671-675 (2012).
- 11 4 Yonezawa, T. *et al.* Biselyngbyaside, isolated from marine cyanobacteria,  
12 inhibits osteoclastogenesis and induces apoptosis in mature osteoclasts. *Journal*  
13 *of cellular biochemistry* **113**, 440-448, doi:10.1002/jcb.23213 (2012).

14

## 15 **Supplementary Figure Legends**

### 16 **Supplementary Figure S1. Abnormalities of bone tissues in OVX rats.**

- 17 (a) Representative micro-CT images of tibias at 4 and 8 weeks after Sham or OVX  
18 operation in rats. (b–e) Quantitative changes in trabecular parameters, including

1 trabecular bone volume expressed as b: percentage of total tissue volume (BV/TV), c:  
2 trabecular thickness (Tb.Th), d: trabecular number (Tb.N), and e: trabecular separation  
3 (Tb.Sp). \* $P < 0.05$ . Data are expressed as mean  $\pm$  SE of 4–5 animals.

4

5 **Supplementary Figure S2. Characterisation of Sham-MSCs, OVX-MSCs-WJ(-),**  
6 **and OVX-MSCs-WJ(+).**

7 (a) Immunophenotype expression of cell surface antigens analysed by flow cytometry in  
8 Sham-MSCs (upper panels), OVX-MSCs-WJ(-) (middle panels), and  
9 OVX-MSCs-WJ(+) (lower panels). (b) Phase contrast observations of Sham-MSCs (left  
10 panel) and OVX-MSCs (right panel). Images were obtained from P0, P1, and P2 cells at  
11 12 weeks after surgery. Bar: 100  $\mu$ m. (c) Osteogenic and adipogenic differentiation of  
12 Sham-MSCs (left panel), OVX-MSCs-WJ(-) (middle panel), and OVX-MSCs-WJ(+)  
13 (right panel). Images were obtained at 14 days after culture with osteogenic or  
14 adipogenic differentiation medium. Bone matrices are stained blue using an alkaline  
15 phosphatase (ALP) staining kit, and red by alizarin red staining kit. Fat droplets are  
16 stained red with Oil red O staining. Bar: 100  $\mu$ m.

17

18 **Supplementary Figure S3. WJS enhanced the mobilisation of OVX-MSCs.**

1 (a) Chemotaxis assay. Phase contrast observations of BMCs mobilised into the bottom  
2 of the lower chamber without any chemokines (upper panel), with SDF-1 (middle upper  
3 panel), IL-1 $\beta$  (middle lower panel), or IL-6 (lower panel). Images were obtained 24 h  
4 after culture with SDF-1, IL-1 $\beta$ , or IL-6. Bar: 500  $\mu$ m. SDF-1, stromal cell-derived  
5 factor 1; IL-1 $\beta$ , interleukin-1 beta; IL-6, interleukin-6. (b) Numbers of migrated  
6 BM-MSCs in the bottom of lower chambers counted under a light microscope. Values  
7 represent mean  $\pm$  SE of Sham-MSCs, OVX-MSCs-WJ(-), and OVX-MSCs-WJ(+). \* $P$  <  
8 0.05. Data are expressed as mean  $\pm$  SE of three BM-MSCs cultures.

9

10 **Supplementary Figure S4. Distribution of Sham-MSCs, OVX-MSCs, and**  
11 **OVX-MSCs-WJ(+) in OVX rats.**

12 Distribution of administered Sham-MSCs, OVX-MSCs, and OVX-MSCs-WJ(+) in  
13 OVX rats at days 1, 3, and 7. DAPI was used for counterstaining nuclei (blue). White  
14 dotted line indicated the edge of trabeculae bone. (a) BM-MSCs were detected in bone  
15 using the immunofluorescence marker PKH26 (red). Bar: 50  $\mu$ m. (b) Numbers of  
16 BM-MSCs detected in bone tissues. \* $P$  < 0.05. Values represent mean  $\pm$  SE of  
17 Sham-MSCs rats, OVX-OVX-MSCs-WJ(-) rats, OVX-OVX-MSCs-WJ(+) rats, n = 4 in  
18 day1 and day3 per group and n = 3 in day 7 per group. (c) BM-MSCs were detected in



1 the lung. Bar: 100  $\mu$ m. (d) Numbers of detected BM-MSCs counted under a light  
2 microscope. Values represent mean  $\pm$  SE of Sham-MSCs, OVX-MSCs-WJ(-), and  
3 OVX-MSCs-WJ(+). \* $P < 0.05$ . Data are expressed as mean  $\pm$  SE of three BM-MSCs  
4 cultures.

5

6 **Supplementary Figure S5. Differentiation of RAW264.7 cells into osteoclasts.**

7 (a) Experimental protocol to induce macrophage-derived osteoclasts using RAW264.7  
8 cells. (b) Phase contrast observations of RAW264.7 cells cultured without RANKL (left  
9 panel), with RANKL (middle panel), and with RANKL and PD98059 (right panel).  
10 Images were obtained 72 h after adding RANKL with or without PD98059 to the  
11 culture medium. Bar: 500  $\mu$ m in upper panel, 100  $\mu$ m in lower panel. (c) TRACP levels  
12 in the supernatant of RAW264.7 cell-derived osteoclasts. \* $P < 0.05$ . Data are expressed  
13 as mean  $\pm$  SE of three experiments.

14

15 **Supplementary Figure S6. Differentiation of mouse BMCs into osteoclasts.**

16 (a) Experimental protocol to induce macrophage-derived osteoclasts using BMCs from  
17 mice. (b) Phase contrast observations of BMCs cultured without RANKL (left panel),  
18 with RANKL (middle panel), and with RANKL and PD98059 (right panel). Images

1 were obtained 10 days after adding RANKL with or without PD98059 to the culture  
2 medium. Bar: 500  $\mu\text{m}$  in upper panel, 100  $\mu\text{m}$  in lower panel. (c) TRACP levels in the  
3 supernatant of BMC-derived osteoclasts. \* $P < 0.05$ . Data are expressed as mean  $\pm$  SE of  
4 six experiments.

5

## 6 **Supplementary Table Legends and Captions**

### 7 **Supplementary Table S1. Primary antibodies used for fluorescence-activated cell**

#### 8 **sorting analysis**

9 Ms, mouse; Rt, rat; Hu, human.

10

### 11 **Supplementary Table S2. Secondary antibodies used for fluorescence-activated cell**

#### 12 **sorting analysis.**

13 Dnk, donkey.

14

### 15 **Supplementary Table S3. Primary antibodies used for immunofluorescence.**

16 RANK, receptor activator of NF- $\kappa$ B; TRACP, tartrate-resistant acid phosphatase; IL-1 $\beta$ ,

17 interleukin-1 beta; IL-6, interleukin-6; TGF- $\beta$ , transforming growth factor  $\beta$ 1; Ms,

18 mouse; Rt, rat; Hu, human.

19

### 20 **Supplementary Table S4. Secondary antibodies used for immunofluorescence.**

21 Dnk, donkey.

1  
2  
3  
4  
5  
6  
7  
8  
9  
10  
11  
12  
13  
14  
15  
16  
17  
18  
19

**Supplementary Table S5. Primer sequences used for quantitative RT-PCR of rat BM-MSCs.**

*Opg*, osteoprotegerin; *Gapdh*, glyceraldehyde 3-phosphate dehydrogenase.

**Supplementary Table S6. Recombinant chemokines used for chemotaxis assay.**

SDF-1, stromal-cell derived factor-1; IL-1 $\beta$ , interleukin-1 beta; IL-6, interleukin-6; Rt, rat.

**Supplementary Table S7. Primer sequences used for quantitative RT-PCR of RAW264.7 cell-derived osteoclasts and mouse bone marrow-derived osteoclasts.**

*Nfatc1*, nuclear factor of activated T cells; *Cath-k*, cathepsin K; *Clc7*, chloride channel 7; *Atp6i*, ATPase, H<sup>+</sup> transporting, (vacuolar proton pump) member I; *Dc-stamp*, dendritic cell-specific transmembrane protein; *Gapdh*, glyceraldehyde 3-phosphate dehydrogenase.

**Supplementary Tables**

**Supplementary Table S1. Primary antibodies used for fluorescence-activated cell sorting analysis**

---

| <b>Antibody</b> | <b>Species</b> | <b>Reactivity</b> | <b>Manufacture</b> |
|-----------------|----------------|-------------------|--------------------|
|-----------------|----------------|-------------------|--------------------|

---

---

| <b>Immunophenotype</b> |          |            |               |
|------------------------|----------|------------|---------------|
| CD90(Thy1.1)           | Ms-IgG1  | Ms, Rt     | BioLegend     |
| CD44                   | Ms-IgG1  | Rt         | BioLegend     |
| CD31                   | Ms-IgG1  | Rt         | AbD Serotec   |
| HLA-DR                 | Ms-IgG1  | Rt         | BioLegend     |
| CD45                   | Ms-IgG2a | Rt         | BioLegend     |
| CD11b                  | Ms-IgG2a | Rt         | BioLegend     |
| CD34                   | Rb       | Ms, Rt, Hu | BioLegend     |
| Mouse IgG1             |          | -          | BD Bioscience |
| Mouse IgG2a            |          | -          | BD Bioscience |
| Rabbit IgG             |          | -          | BioLegend     |

---

1

2 **Supplementary Table S2. Secondary antibodies used for fluorescence-activated cell**

3 **sorting analysis**

---

| <b>Antibody</b>        | <b>Species</b> | <b>Conjugate</b> | <b>Manufacture</b> |
|------------------------|----------------|------------------|--------------------|
| <b>Immunophenotype</b> |                |                  |                    |
| Anti-mouse IgG         | Dnk            | FITC             | Chemicon           |
| Anti-rabbit IgG        | Dnk            | FITC             | Chemicon           |

---

4

1 **Supplementary Table S3. Primary antibodies used for immunofluorescence**

| <b>Antibody</b>           | <b>Species</b>      | <b>Reactivity</b> | <b>Manufacturer</b>      |
|---------------------------|---------------------|-------------------|--------------------------|
| <b>Immunofluorescence</b> |                     |                   |                          |
| RANK                      | Rt                  | Ms, Rt, Hu        | Santa Cruz Biotechnology |
| TRACP                     | Ms                  | Ms, Rt, Hu        | BioLegend                |
| IL-1 $\beta$              | American<br>Hamster | Ms, Rt            | BioLegend                |
| IL-6                      | Goat                | Ms, Rt            | Santa Cruz Biotechnology |
| TGF- $\beta$ 1            | Rb                  | Ms, Rt, Hu, Pig   | Abcam                    |

2

3 **Supplementary Table S4. Secondary antibodies used for immunofluorescence**

| <b>Antibody</b>              | <b>Species</b> | <b>Conjugate</b> | <b>Manufacturer</b> |
|------------------------------|----------------|------------------|---------------------|
| <b>Immunofluorescence</b>    |                |                  |                     |
| Anti-mouse IgG               | Dnk            | Cy3              | Chemicon            |
| Anti-rabbit IgG              | Dnk            | Cy3              | Jackson Laboratory  |
| Anti-American<br>Hamster IgG | Goat           | DyLight649       | BioLegend           |
| Anti-Goat IgG                | Dnk            | Cy3              | Merck Millipore     |

4

1 **Supplementary Table S5. Primer sequences used for quantitative PCR of**

2 **BM-MSCs**

| Gene         | Locus     | Direction | Sequence                              |
|--------------|-----------|-----------|---------------------------------------|
| <i>Opg</i>   | NM_012870 | forward   | 5'- <i>gccaacactgatggagcagat</i> -3'  |
|              |           | reverse   | 5'- <i>tcttcattcccaccaactgatg</i> -3' |
| <i>Gapdh</i> | NM_017008 | forward   | 5'- <i>caaggatactgagagcaagaga</i> -3' |
|              |           | reverse   | 5'- <i>aggcccctcctgttattat</i> -3'    |

3

4 **Supplementary Table S6. Recombinant chemokines used for chemotaxis assay**

| Recombinant    | Reactivity | Manufacturer |
|----------------|------------|--------------|
| SDF-1 $\alpha$ | Rt         | Peprtech     |
| IL-1 $\beta$   | Rt         | BioLegend    |
| IL-6           | Rt         | BioLegend    |

5

6 **Supplementary Table S7. Primer sequences used for quantitative RT-PCR of**

7 **RAW264.7 cell-derived osteoclasts and mouse bone marrow-derived osteoclasts**

| Gene          | Locus      | Direction | Sequence                              |
|---------------|------------|-----------|---------------------------------------|
| <i>Nfatc1</i> | NM_1164111 | forward   | 5'- <i>cagtgtgaccgaagatacctgg</i> -3' |
|               |            | reverse   | 5'- <i>tcgagacttgatagggacccc</i> -3'  |

|                 |               |         |                                |
|-----------------|---------------|---------|--------------------------------|
| <i>Cath-k</i>   | NM_007802     | forward | 5'- aatacctccctctcgatcctaca-3' |
|                 |               | reverse | 5'- tggttcttgactggagtaacgta-3' |
| <i>Clc7</i>     | NM_011930     | forward | 5'- gacaacagcgagaatcagctc-3'   |
|                 |               | reverse | 5'- ccaatgagggcacagataacc-3'   |
| <i>Atp6i</i>    | NM_001167784. | forward | 5'- attgccagcttcgggagac-3'     |
|                 |               | reverse | 5'- cggatcttctgtccgatctgc-3'   |
| <i>Dc-stamp</i> | NM_001289506  | forward | 5'- ctgtgtcctcccgtgaataa-3'    |
|                 |               | reverse | 5'- agccgatacagcagatagtc-3'    |
| <i>Gapdh</i>    | NM_01289726   | forward | 5'- tggccttcctgttcctac-3'      |
|                 |               | reverse | 5'- gagggtgctgtgaagtcgca-3'    |

---

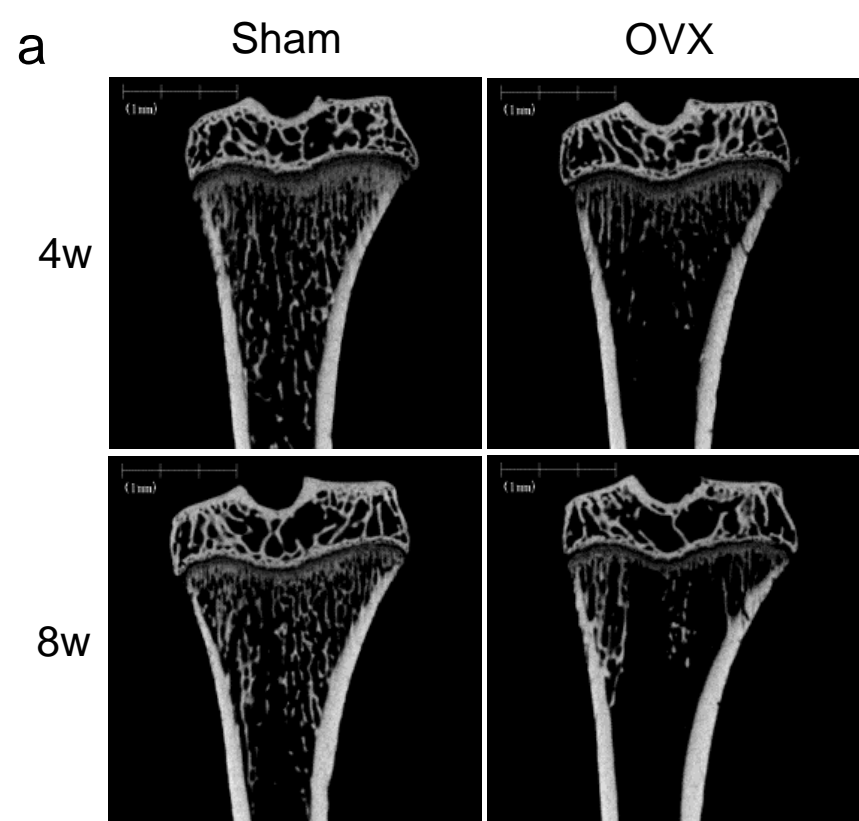

b Bone volume fraction

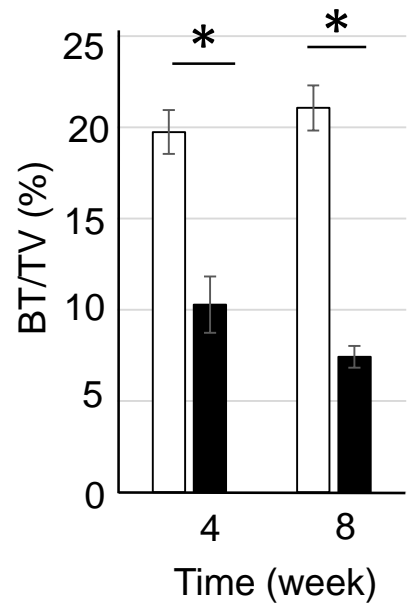

c Trabecular thickness

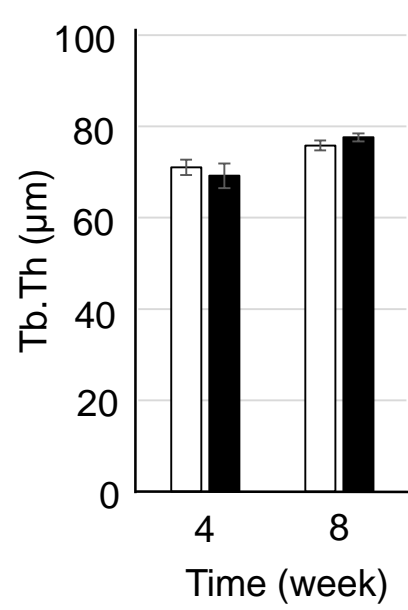

d Trabecular number

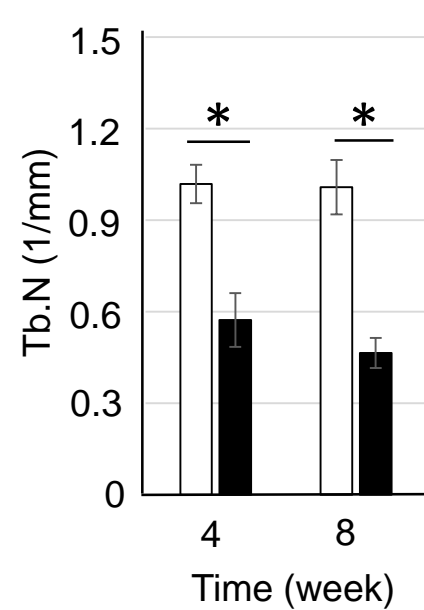

e Trabecular separation

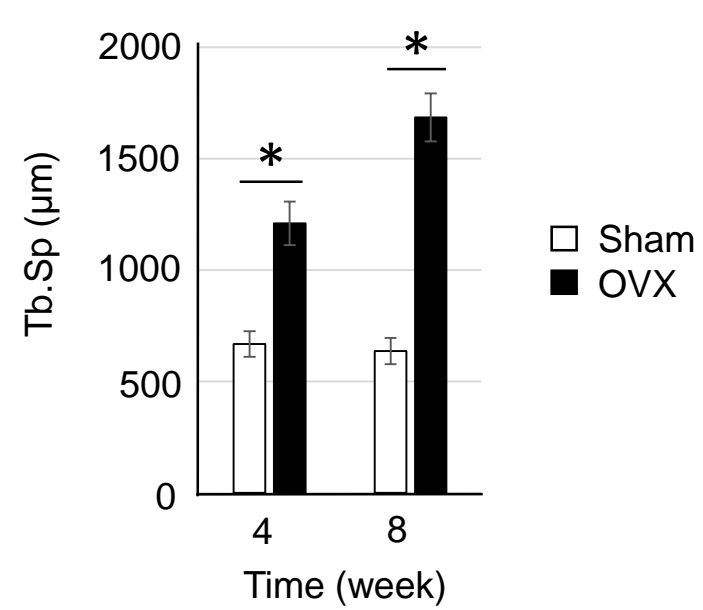

□ Sham  
■ OVX



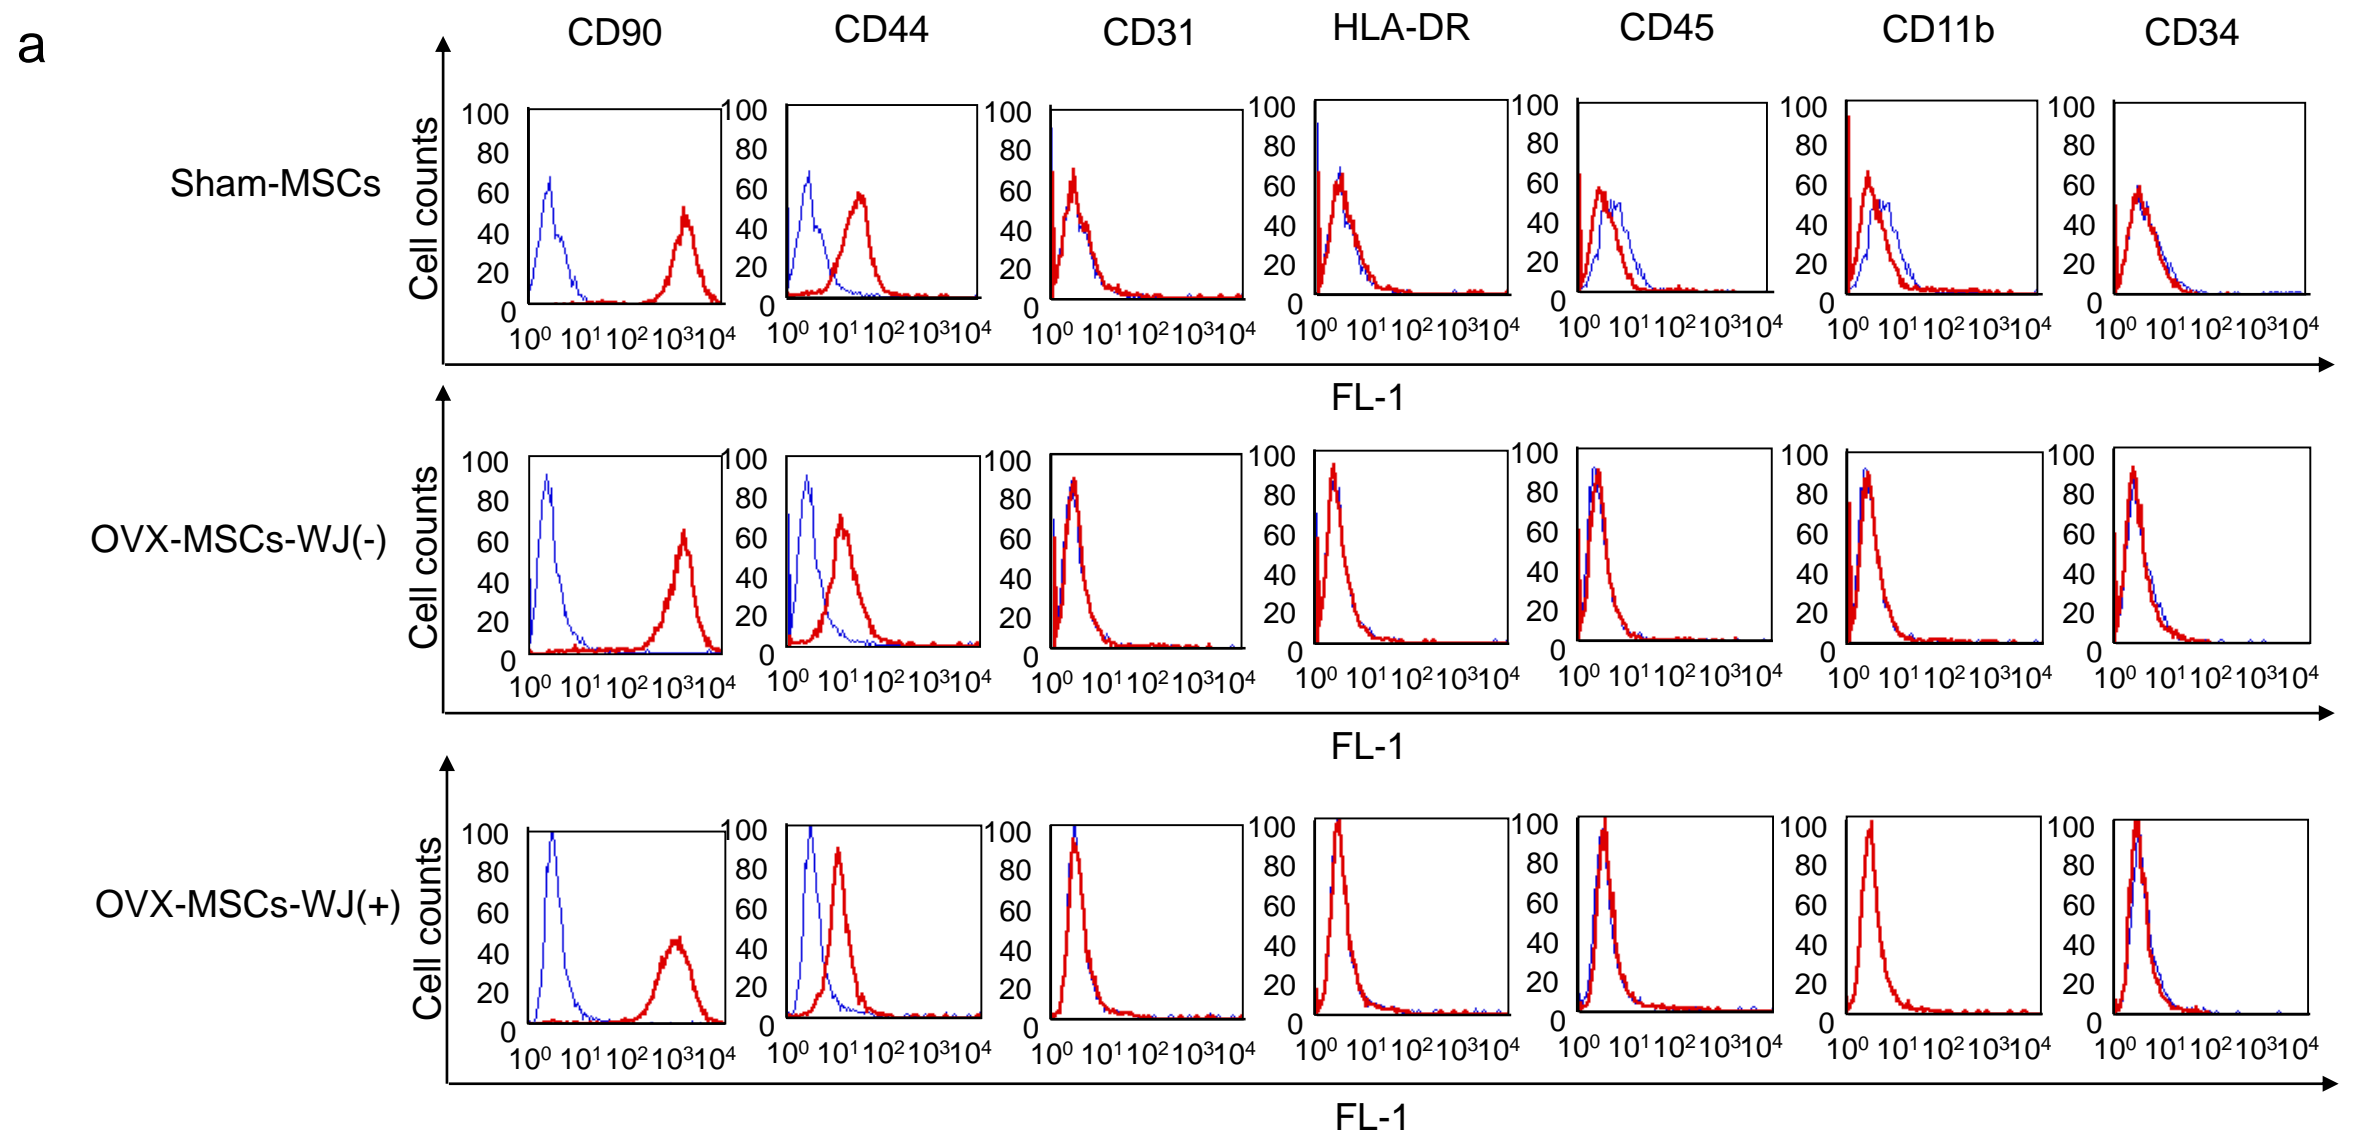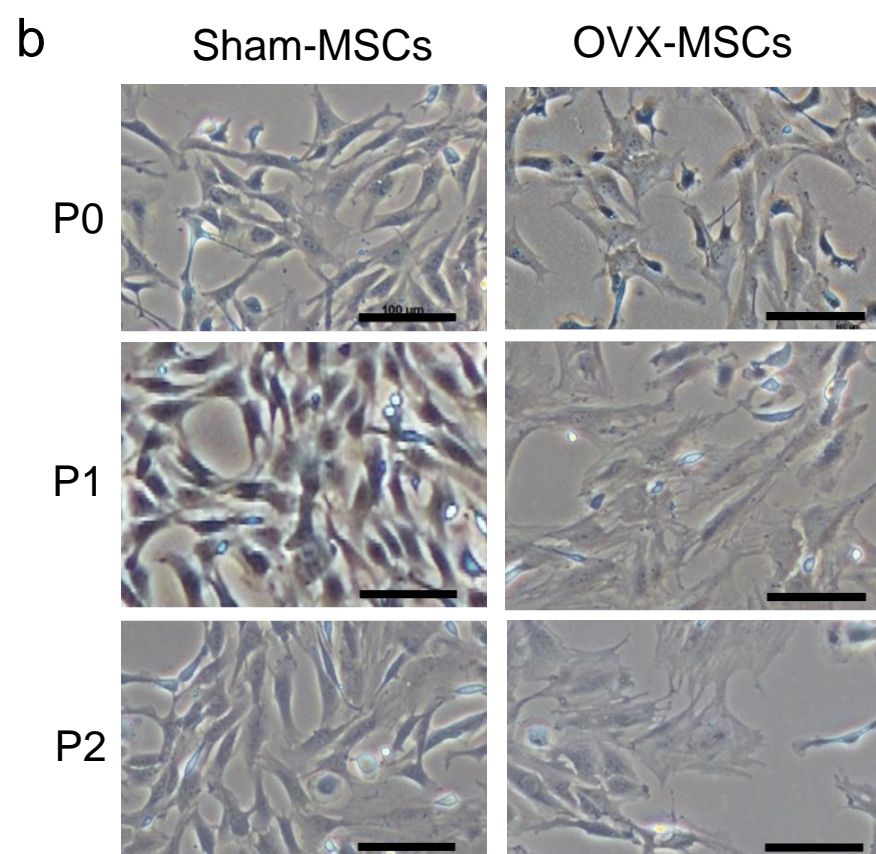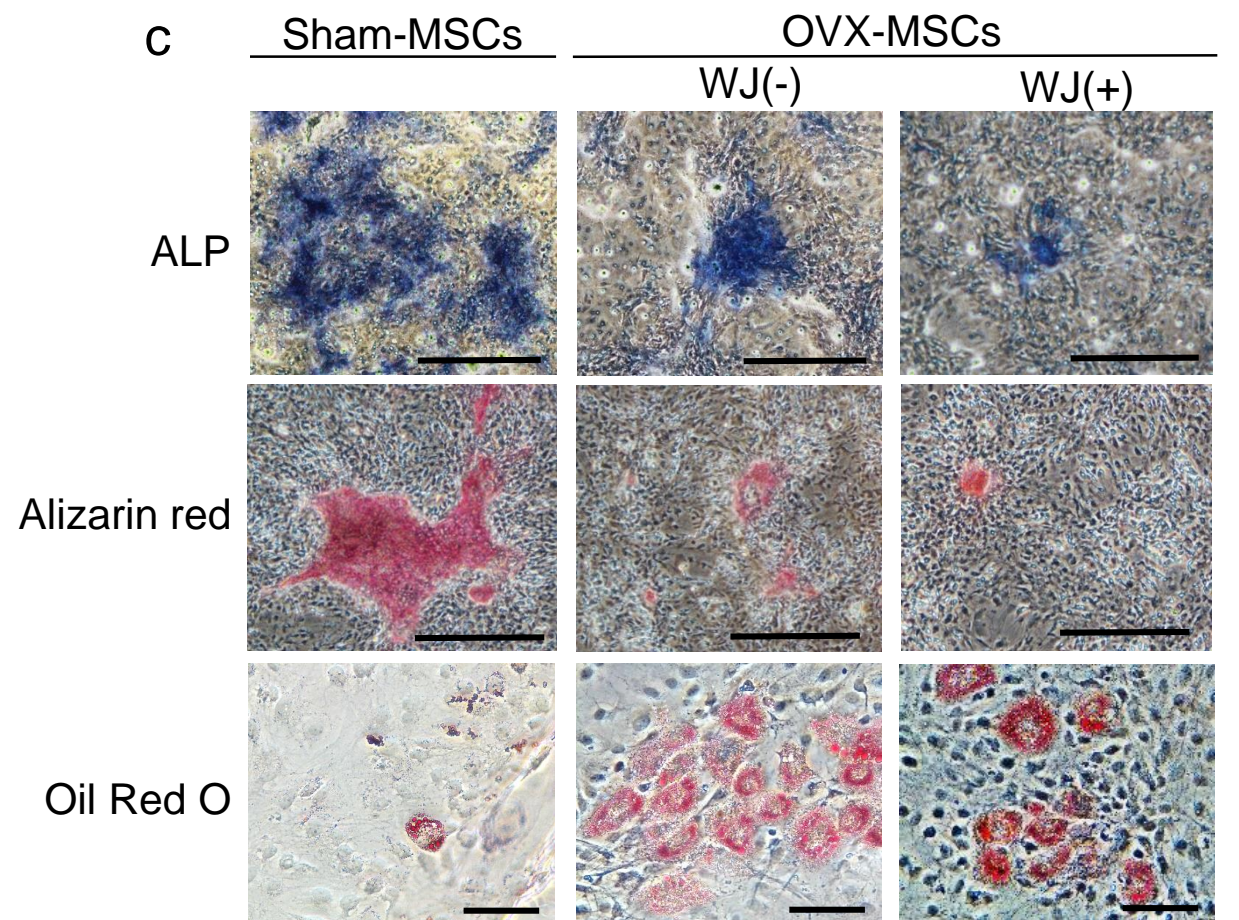

a

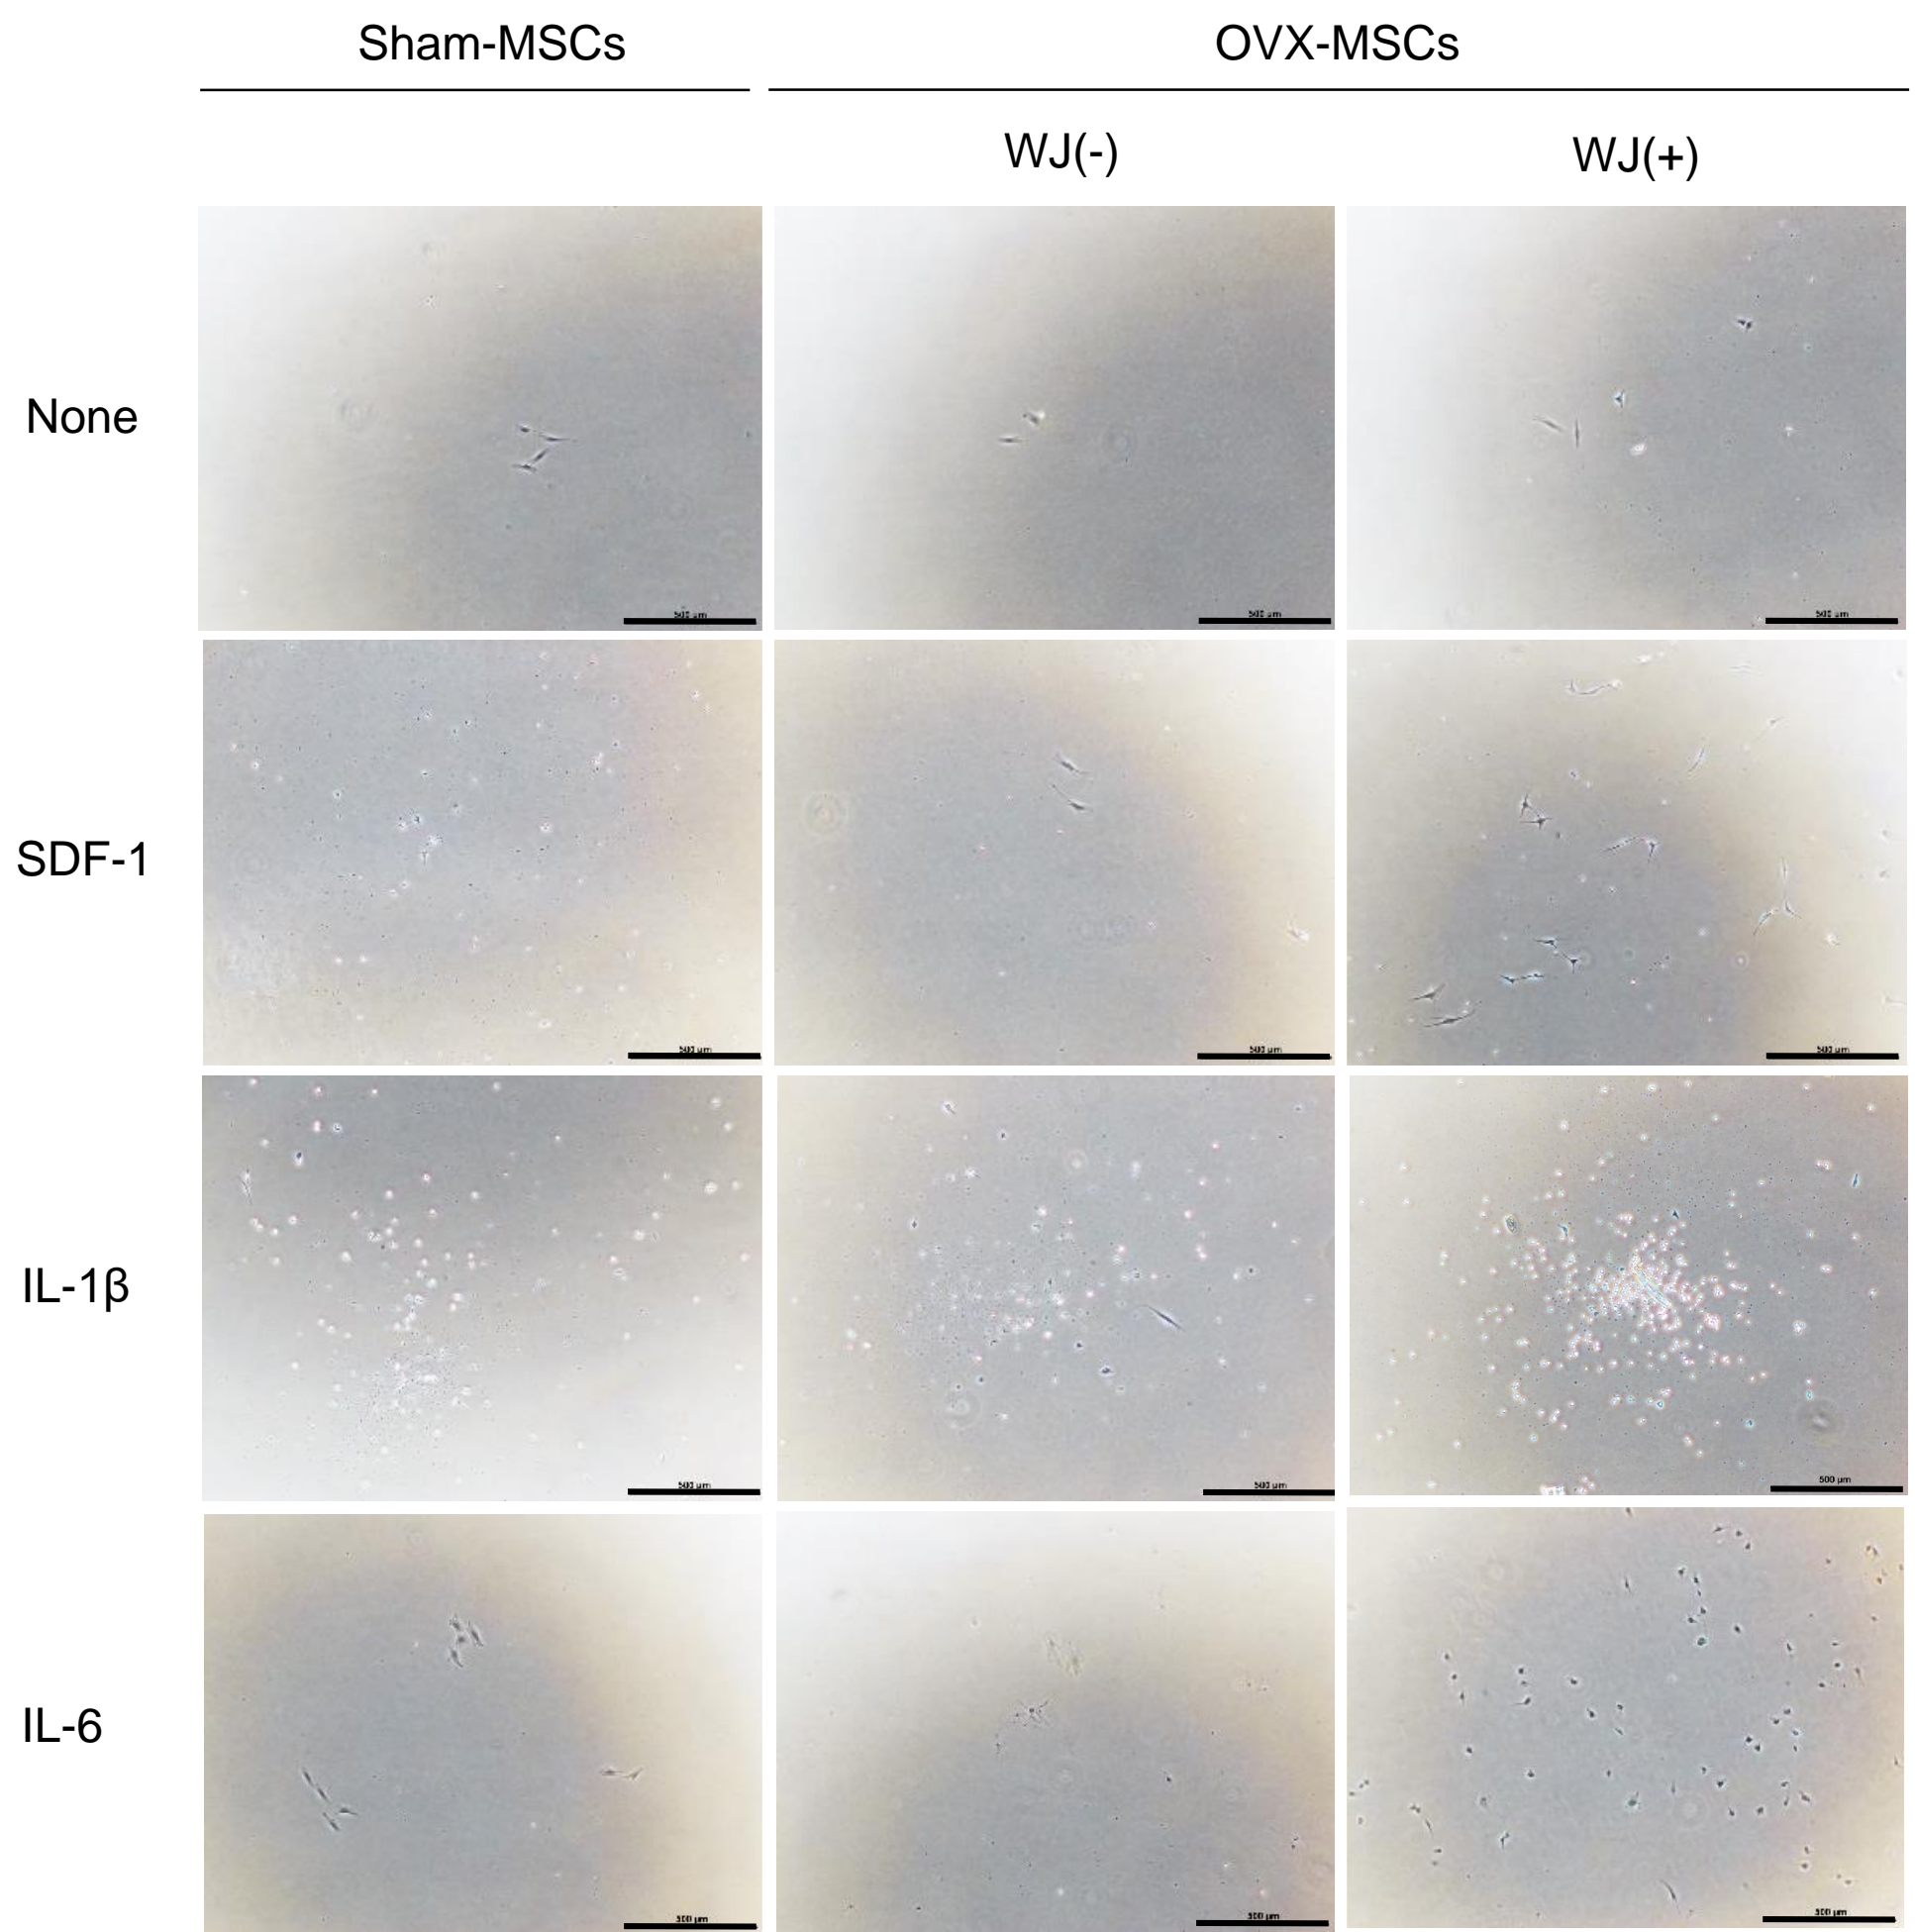

b

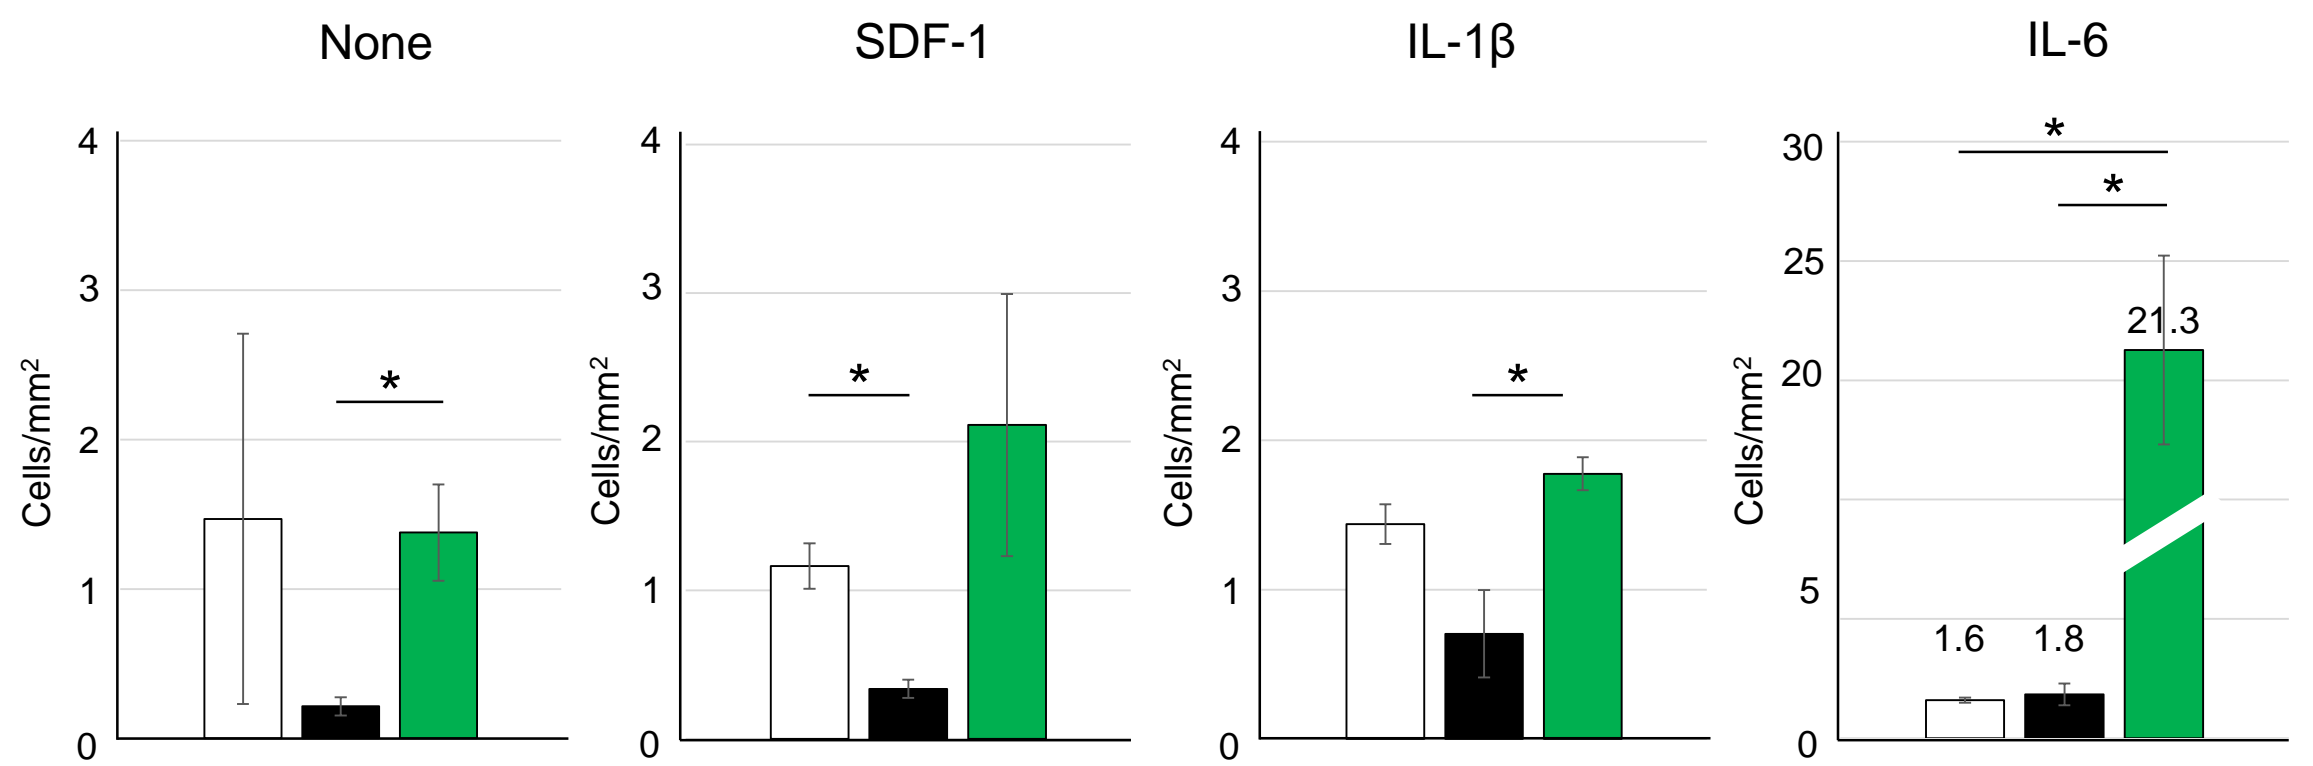

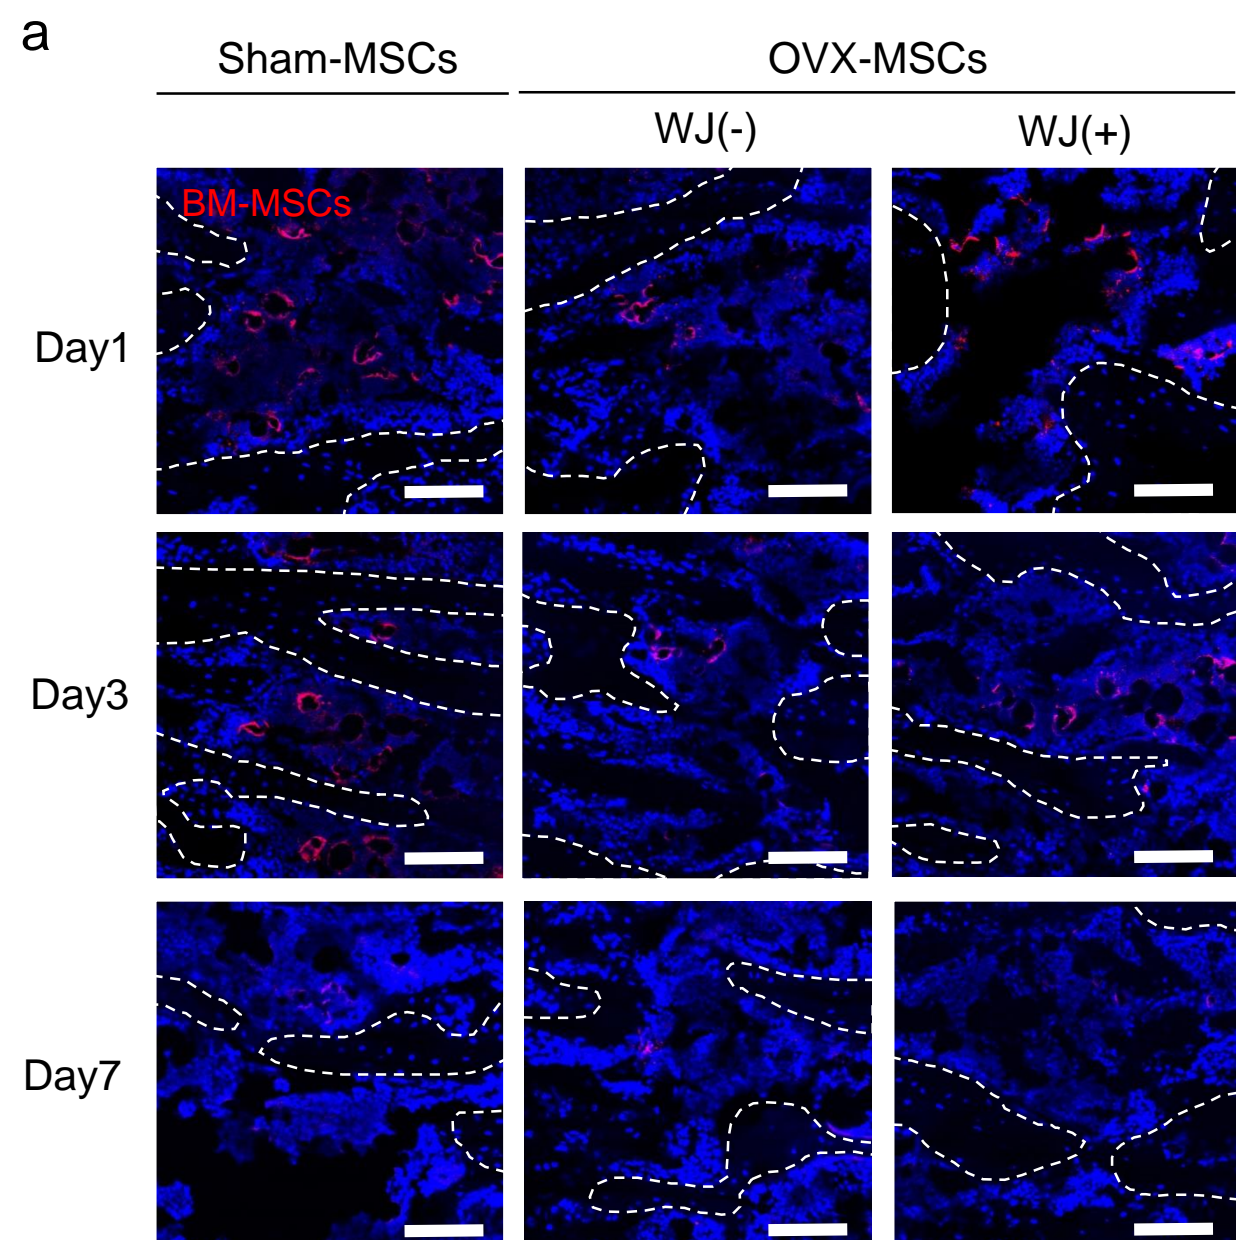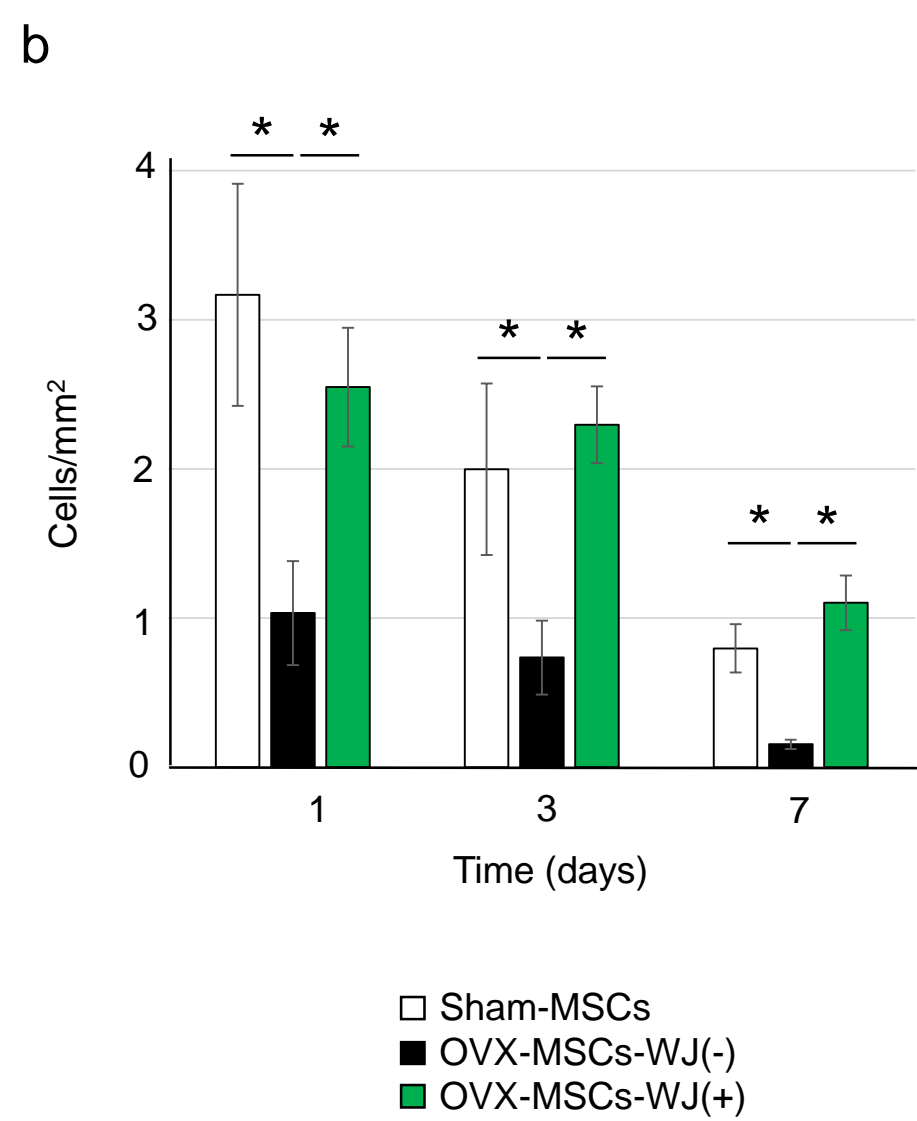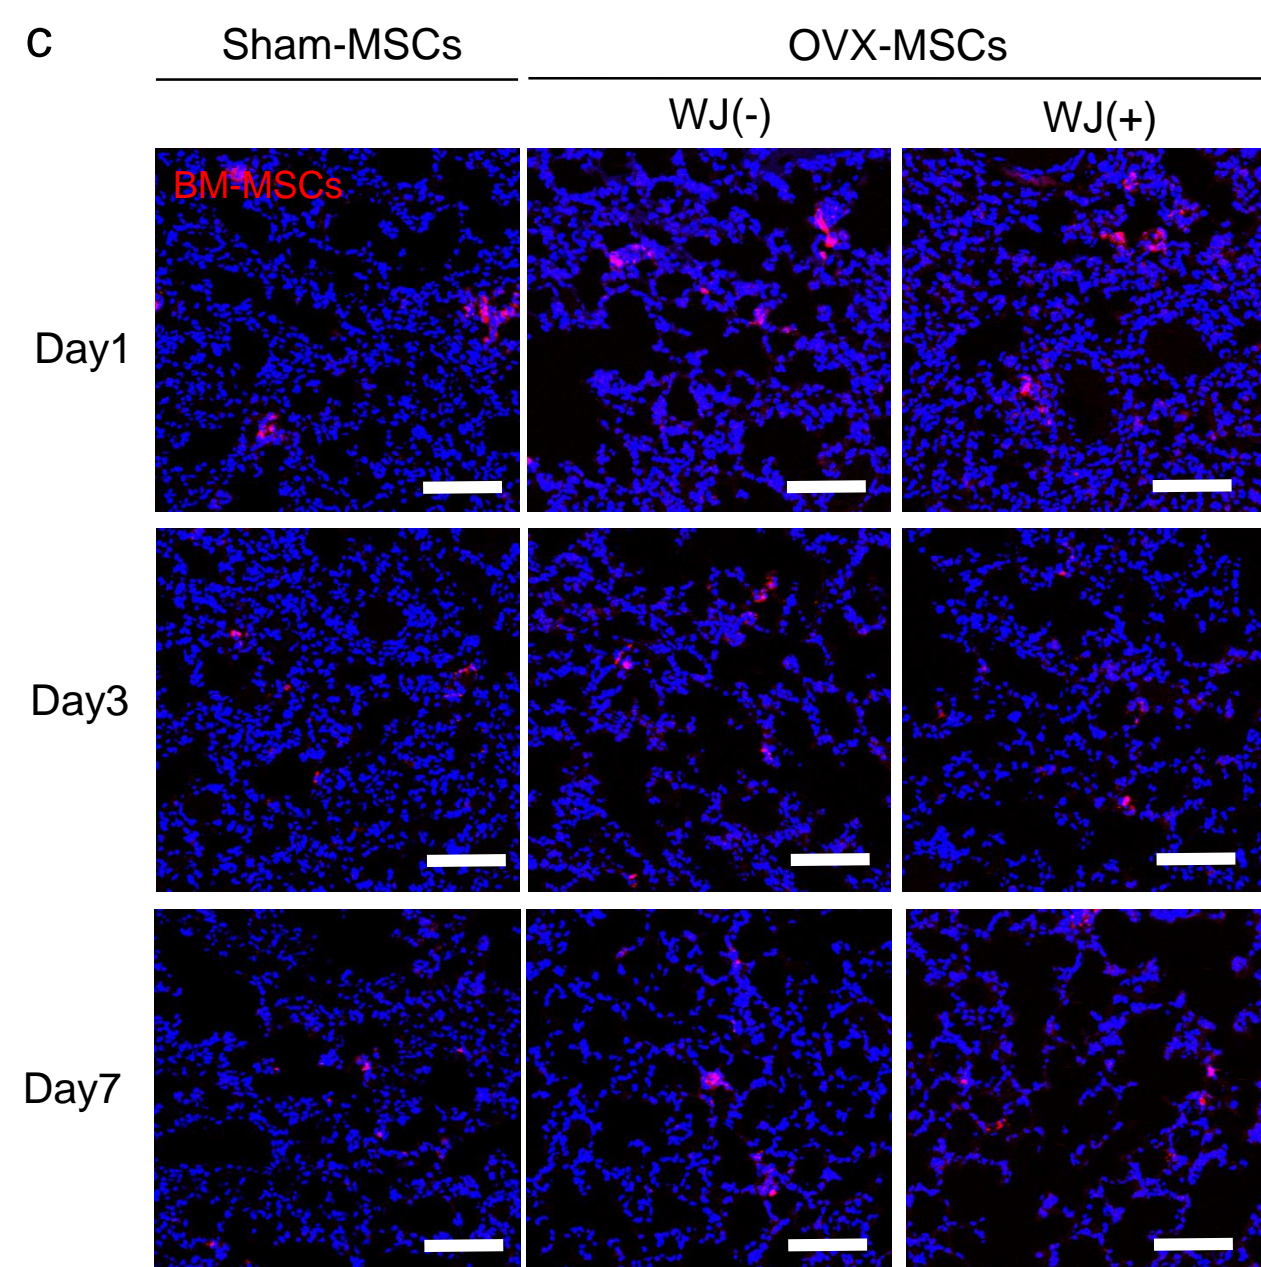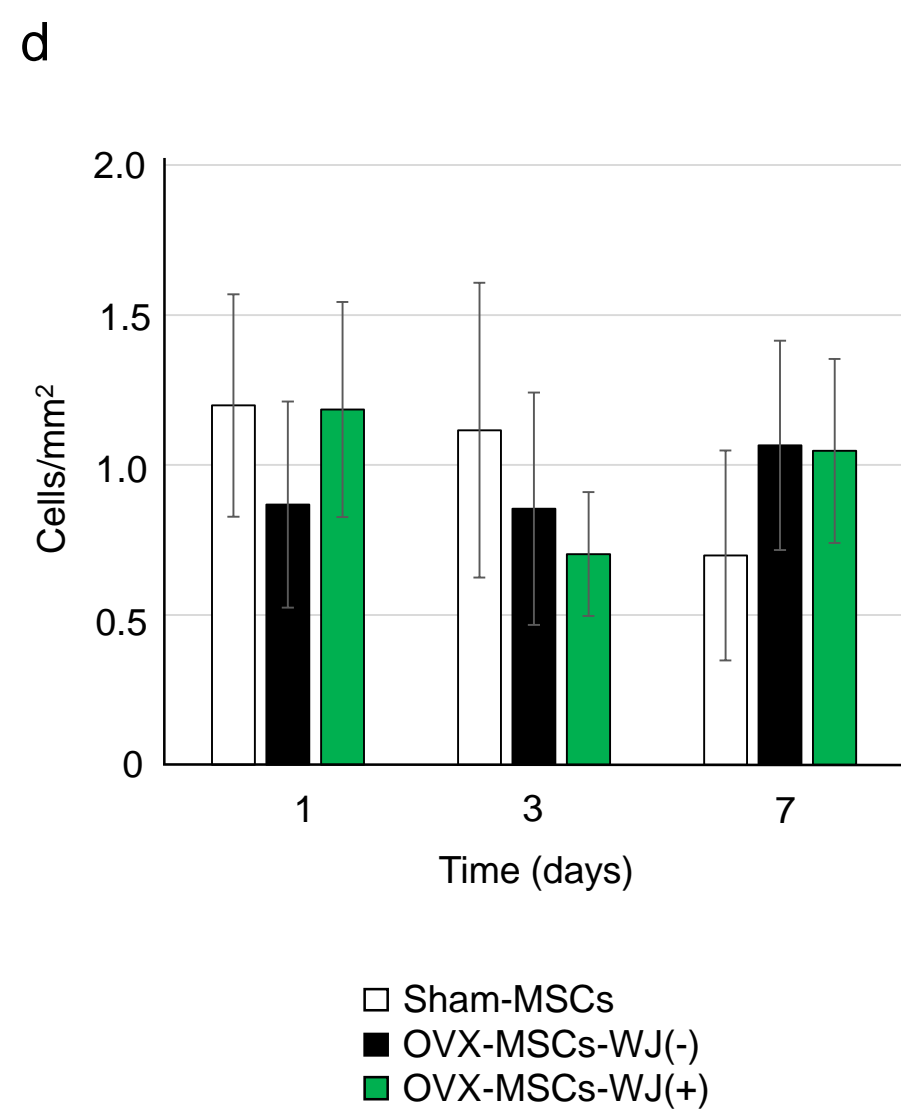

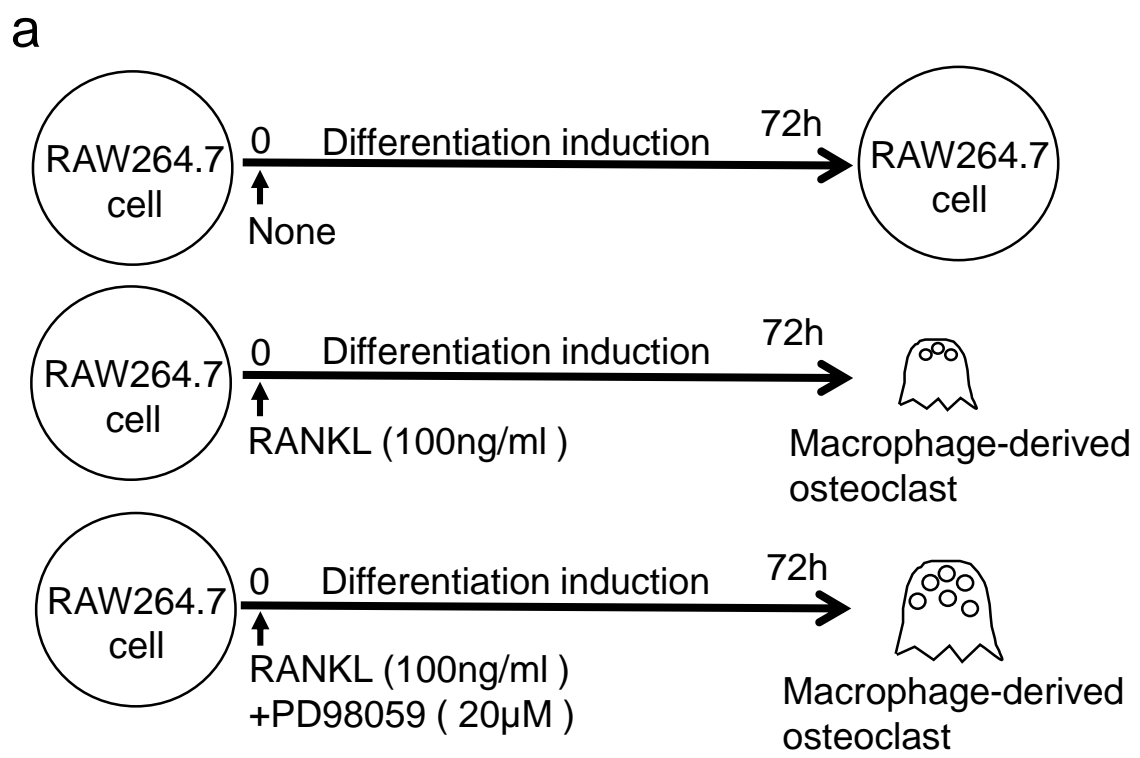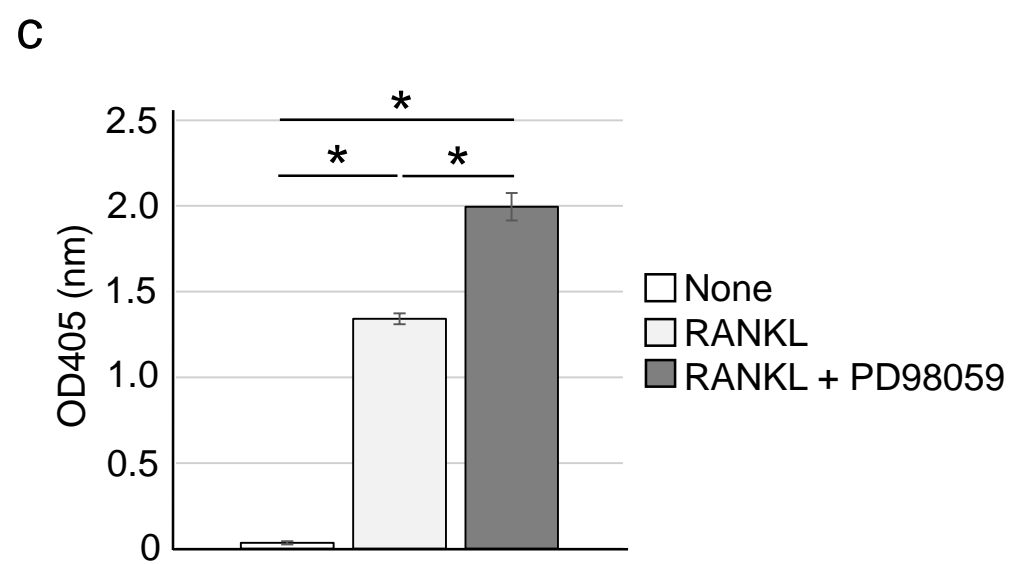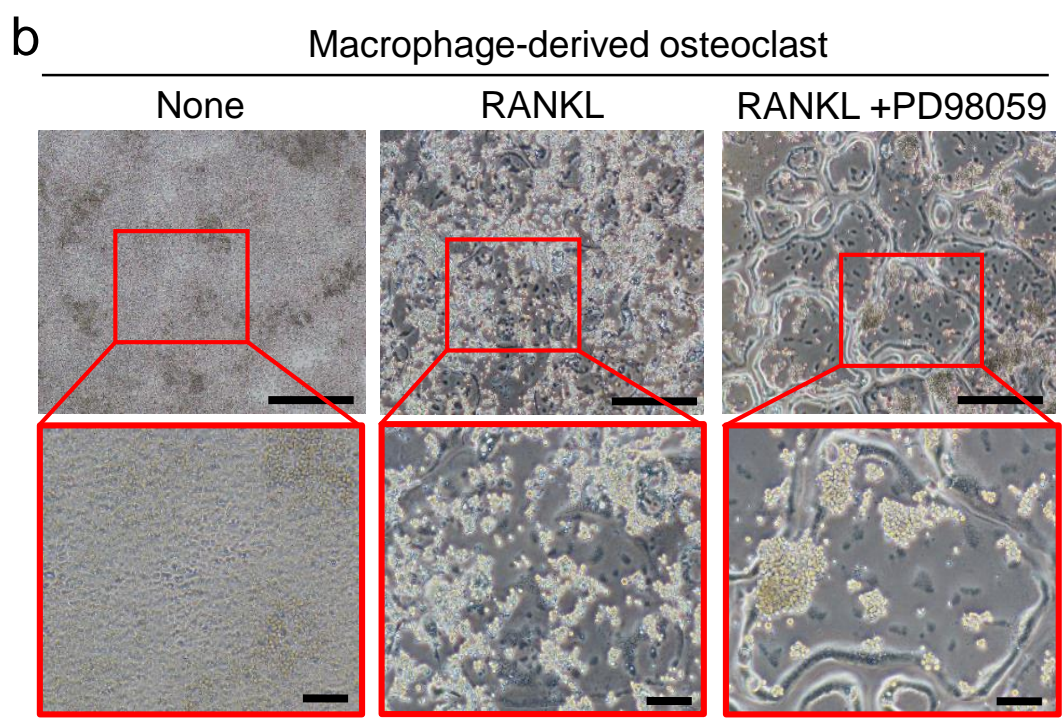

a

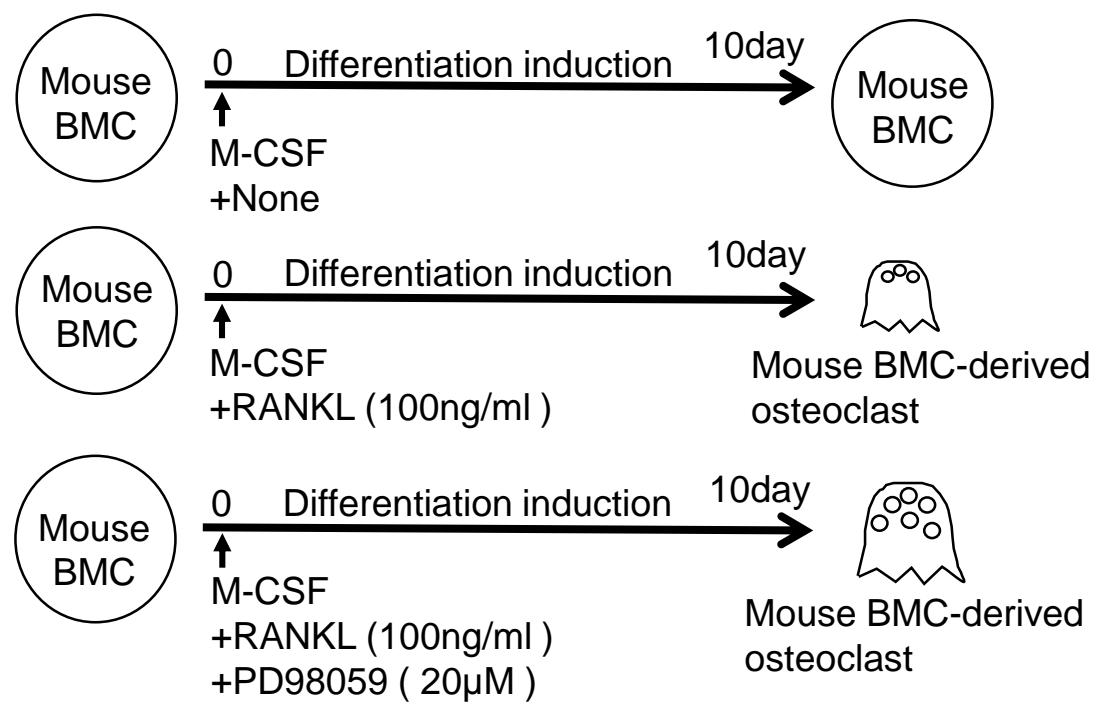

b

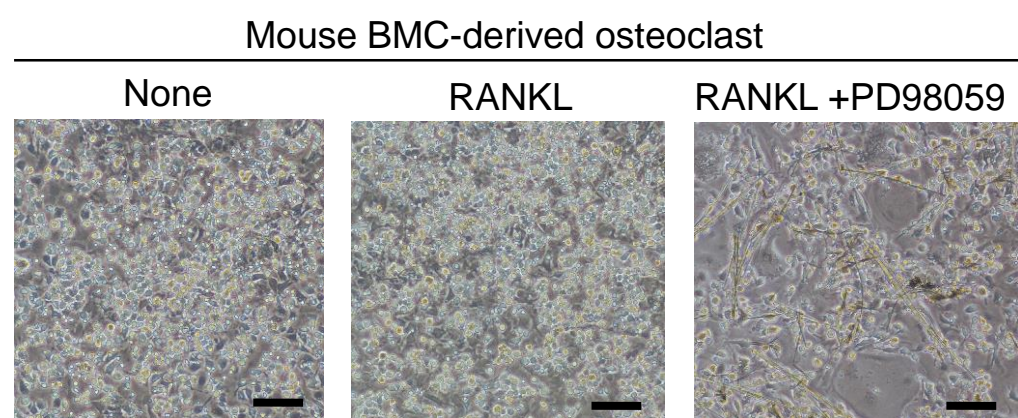

c

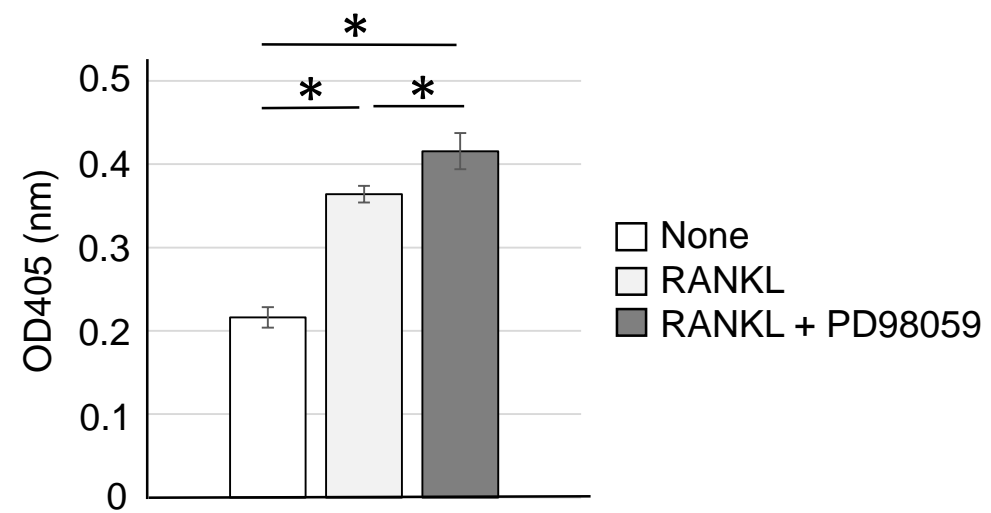

Supplement: 41598_2018_19516_MOESM1_ESM.pdf [file 41598_2018_19516_MOESM1_ESM.pdf]
